# Supplementary material
Source: publisher figshare collection journal article supplement (https://acs.figshare.com/ndownloader/files/5720148)
Supplement: Supplementary file 1 [file 5720148]

**Table S1.** Data Collection and Refinement Statistics

|                                           | MeOH                                          | EtOH                                          |
|-------------------------------------------|-----------------------------------------------|-----------------------------------------------|
| Wavelength (Å)                            | 0.970                                         | 0.980                                         |
| Space group                               | P2 <sub>1</sub> 2 <sub>1</sub> 2 <sub>1</sub> | P2 <sub>1</sub> 2 <sub>1</sub> 2 <sub>1</sub> |
| Cell dimensions                           |                                               |                                               |
| a (Å)                                     | 70.7                                          | 71.4                                          |
| b (Å)                                     | 171.3                                         | 172.4                                         |
| c (Å)                                     | 221.3                                         | 221.1                                         |
| Resolution (Å)                            | 30–2.05                                       | 30–1.96                                       |
| Total observations                        | 1,528,378                                     | 2,094,314                                     |
| Unique reflections                        | 163,616                                       | 192,245                                       |
| I/σ(I) <sup>a</sup>                       | 16.6 (4.1)                                    | 17.8 (3.6)                                    |
| R <sub>sym</sub> (%) <sup>a,b</sup>       | 6.8 (35.8)                                    | 6.4 (44.2)                                    |
| Completeness (%) <sup>a</sup>             | 96.8 (81.5)                                   | 98.1 (87.4)                                   |
| Resolution range (Å)                      | 30–2.05                                       | 30–1.96                                       |
| Reflections used                          | 150,517                                       | 176,692                                       |
| R <sub>cryst</sub> <sup>c</sup>           | 0.218                                         | 0.214                                         |
| R <sub>free</sub> <sup>d</sup>            | 0.243                                         | 0.255                                         |
| Rms deviations                            |                                               |                                               |
| Bond lengths (Å)                          | 0.014                                         | 0.006                                         |
| Bond angles (°)                           | 1.76                                          | 1.16                                          |
| Dihedral angles (°)                       | 20.6                                          | 20.1                                          |
| Improper angles (°)                       | 1.06                                          | 1.16                                          |
| Avg B-value (Å <sup>2</sup> ) (all atoms) | 35.5                                          | 39.3                                          |

<sup>a</sup> Values in parentheses are for the highest resolution shells. <sup>b</sup>  $R_{\text{sym}} = \sum |I - \langle I \rangle| / \sum I$ , where  $I$  is the observed intensity and  $\langle I \rangle$  is the average intensity over all observations of symmetry-related reflections. <sup>c</sup>  $R_{\text{cryst}} = \sum ||F_{\text{obs}}| - |F_{\text{calc}}|| / \sum |F_{\text{obs}}|$ , where  $|F_{\text{obs}}|$  and  $|F_{\text{calc}}|$  are the observed and calculated structure factor amplitudes, respectively. <sup>d</sup>  $R_{\text{free}}$  was calculated from a randomly chosen subset of 3.5% of the reflections.

The structure of the oxidized protein without water molecules or the side chain of Glu243 was used as a starting model for rigid body refinement in CNS.15 After one cycle of simulated annealing refinement to remove previous model bias and a cycle of grouped *B*-factor refinement, the protein was manually inspected in O and minor adjustments were made. The model was then subjected to cycles of positional and individual *B*-factor refinement followed by an automated water picking routine. Only peaks  $\geq 3.0\sigma$  in the difference Fourier maps located between 2.5 and 3.3 Å from the protein with *B*-factors  $< 60 \text{ Å}^2$  were written to a file. The peaks in this list were then examined manually in O, and those having no obvious hydrogen bonding partners, or no corresponding electron density in the  $2F_{\text{obs}} - F_{\text{calc}}$  maps, were rejected. Five cycles of water picking were required to locate all 1128 and 1086 water molecules in the methanol- and ethanol-soaked MMOH structures, respectively. The bridging alcohols were added only after the models were nearly complete. The final models had  $R_{\text{cryst}} = 0.218$  ( $R_{\text{free}} = 0.243$ ) and  $R_{\text{cryst}} = 0.214$  ( $R_{\text{free}} = 0.255$ ) for the methanol and ethanol structures, respectively. Simulated annealing omit maps were also calculated to verify the observed electron density feature bridging the iron atoms.
